# Supplementary material for: Global transcriptome analysis of H5N1 influenza virus-infected human cells
Source: Hereditas. 2019 Feb 6;156:10. doi: 10.1186/s41065-019-0085-9 (PMC6366111; doi:10.1186/s41065-019-0085-9)
Supplement: Supplementary file 1 — Table S1. Differentially expressed genes of A549 and 293T cells. (XLS 26 kb) [file 41065_2019_85_MOESM1_ESM.xls]

## Sheet: S1-heatmap
Gene	293T_Control-VS-293T_QH	A549_Control-VS-A549_QH
AANAT	1.72629	2.7308
ACTA1	2.64716	2.78051
AGBL2	3.92221	1.51877
ALB	3.23034	5.79531
ALDH8A1	1.13324	4.30988
ANKRD26P1	3.64537	8.9225
APOE	1.21271	1.14803
AVIL	1.25572	2.52273
BAAT	2.13193	3.26806
BCL2L15	1.71432	1.1806
C1orf162	4.15048	4.03858
C7orf53	1.24414	1.32946
C8orf46	1.55738	2.4701
C9orf152	2.85183	3.79531
CASS4	1.78228	2.45362
CD14	2.28478	1.80087
CD68	2.00035	2.25099
CHRNB2	2.41742	1.59845
CMTM2	3.11486	2.65865
CNTD2	7.83399	2.89845
COL8A2	2.65918	3.35052
DAPP1	2.94493	3.95319
DCAF4L1	1.2461	3.14842
DDN	1.34007	4.98795
DHX58	3.17375	5.50793
DQX1	2.09694	1.65008
ELAVL3	3.11486	2.84356
ELOVL3	9.15032	2.21163
ERAS	2.33725	3.97068
F13B	7.54694	9.40941
FAM154B	1.24224	2.50253
FAM83C	7.5419	9.33593
FAM83E	3.2144	2.85302
FERMT3	1.56439	2.46071
FES	1.00238	1.33588
GPD1	1.58879	1.85379
GPR83	2.11486	2.62806
HCLS1	1.93589	3.08106
HSD3B7	1.2461	1.0928
IFIT2	2.62676	8.75137
IFNA22P	9.57843	10.2147
IFNA5	9.31704	9.76773
LAG3	2.12484	1.79531
LILRA6	1.77091	3.08749
LINC00312	1.99702	-1.22658
LOC100130705	1.41254	1.29022
LOC100505576	6.19193	1.2779
LOC113230	1.04615	-1.13428
LOC339240	7.33839	3.29608
LOC646999	1.21271	2.98795
LRRN4CL	2.40437	3.24361
LTA	3.77782	2.35052
MCCD1	8.66118	10.1213
MMP14	1.6135	1.84728
N4BP2L1	1.64537	2.98795
NPR2	3.43679	1.28861
OTOR	7.75437	8.30347
OVOL1	7.09195	4.26806
PKD1L3	5.9388	4.98795
POPDC2	2.4685	3.39005
PRR18	3.5299	7.53796
PYGM	2.90171	4.99285
RASGRP2	1.13289	3.35052
RFPL3-AS1	1.18982	2.26806
RIN1	2.51175	-1.2002
RSPH4A	1.00265	1.59564
S100A14	3.69982	1.98795
SBSN	3.08449	1.28153
SCARF1	1.41125	1.37324
SELPLG	3.71972	1.52455
SLC17A9	7.46794	8.5879
SLC25A34	1.59764	1.10174
SOX15	1.72	1.14842
TAGLN3	3.69982	10.4107
TLX2	3.5299	1.4701
TNF	7.63382	7.00078
ZMYND10	1.02323	2.35052
ZNF385C	1.8153	1.68961
ZNF596	1.31976	2.13277
